# Supplementary material for: C60dimers connected through pleiadene bridges: fullerenes talking to each other
Source: Royal Society of Chemistry journal article supplement (doi:10.1039/c0jm02635b), 2010-11-15
Supplement: c0jm02635b.pdf [file c0jm02635b.pdf]

SUPPLEMENTARY INFORMATION

**C<sub>60</sub> dimers connected through pleiadene bridges: Fullerenes talking to each other**

Ángela Sastre-Santos,\*<sup>a</sup> Concepción Parejo,<sup>a</sup> Luis Martín-Gomis,<sup>a</sup> Kei Ohkubo,<sup>b</sup> Fernando Fernández-Lázaro<sup>a</sup> and Shunichi Fukuzumi\*<sup>b,c</sup>

List of Contents

|                                             |     |
|---------------------------------------------|-----|
| <sup>1</sup> H-NMR spectrum of <b>1a,b</b>  | S3  |
| H-H COSY spectrum of <b>1a,b</b>            | S3  |
| MS MALDI TOF spectrum of <b>1a,b</b>        | S4  |
| <sup>1</sup> H-NMR spectrum of <b>1c,d</b>  | S5  |
| H-H COSY spectrum of <b>1c,d</b>            | S5  |
| MS MALDI TOF spectrum of <b>1c,d</b>        | S6  |
| MS MALDI TOF spectrum of <b>2</b>           | S7  |
| <sup>1</sup> H-NMR spectrum of <b>3</b>     | S8  |
| MS MALDI TOF spectrum of <b>3</b>           | S9  |
| <sup>1</sup> H-NMR spectrum of <b>5a,b</b>  | S10 |
| <sup>13</sup> C-NMR spectrum of <b>5a,b</b> | S10 |
| MS MALDI TOF spectrum of <b>5a,b</b>        | S11 |
| <sup>1</sup> H-NMR spectrum of <b>5c,d</b>  | S12 |
| <sup>13</sup> C-NMR spectrum of <b>5c,d</b> | S12 |
| MS MALDI TOF spectrum of <b>5c,d</b>        | S13 |
| <sup>1</sup> H-NMR spectrum of <b>7</b>     | S14 |
| <sup>13</sup> C-NMR spectrum of <b>7</b>    | S14 |
| MS MALDI TOF spectrum of <b>7</b>           | S15 |
| <sup>1</sup> H-NMR spectrum of <b>8a,b</b>  | S16 |
| <sup>13</sup> C-NMR spectrum of <b>8a,b</b> | S16 |
| MS MALDI TOF spectrum of <b>8a,b</b>        | S17 |

|                                           |     |
|-------------------------------------------|-----|
| <sup>1</sup> H-NMR spectrum of <b>8c</b>  | S18 |
| <sup>13</sup> C-NMR spectrum of <b>8c</b> | S18 |
| MS MALDI TOF spectrum of <b>8c</b>        | S19 |

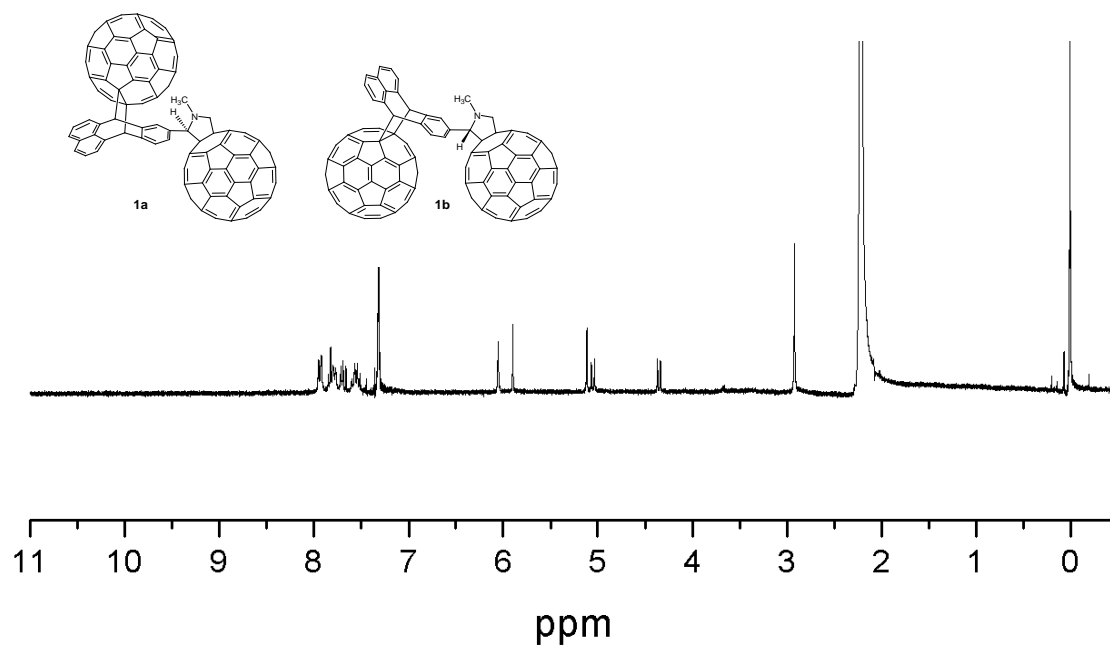

**Fig S1.** <sup>1</sup>H-NMR spectrum of **1a,b**

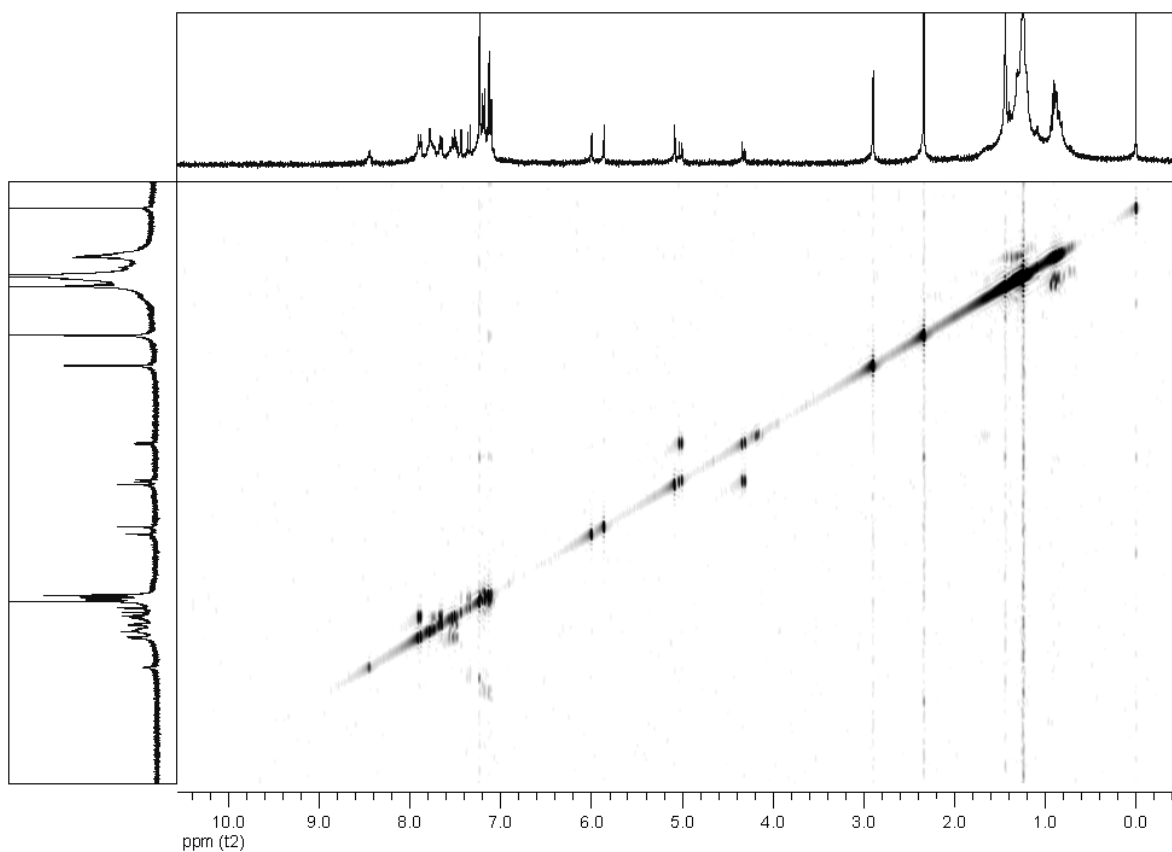

**Fig S2.** H-H COSY spectrum of **1a,b**

Applied Biosystems 4700 Proteomics Analyzer 347000029

4700 Reflector Spec #1 MC=>SM3[BP = 1725.2, 2184]

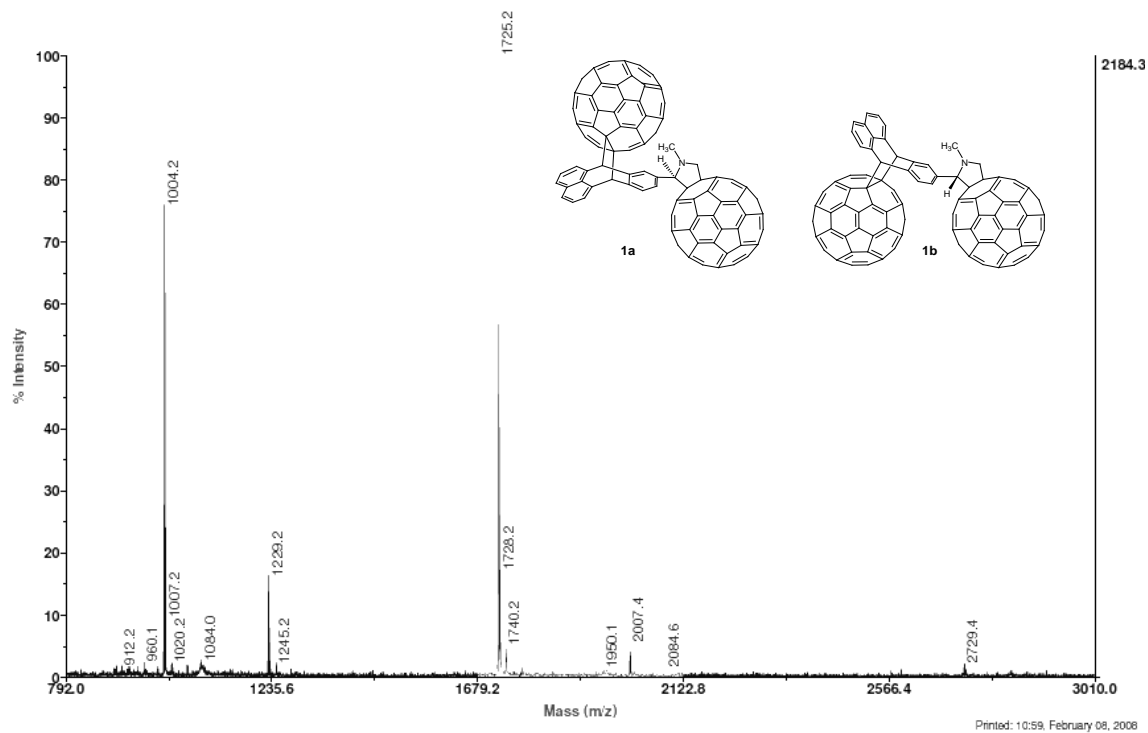

Applied Biosystems 4700 Proteomics Analyzer 347000029

4700 Reflector Spec #1 MC=>SM3[BP = 1725.2, 2184]

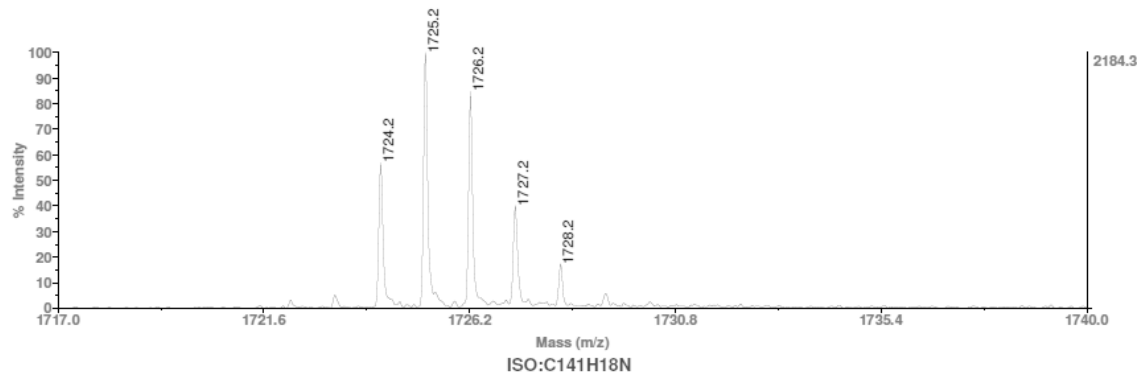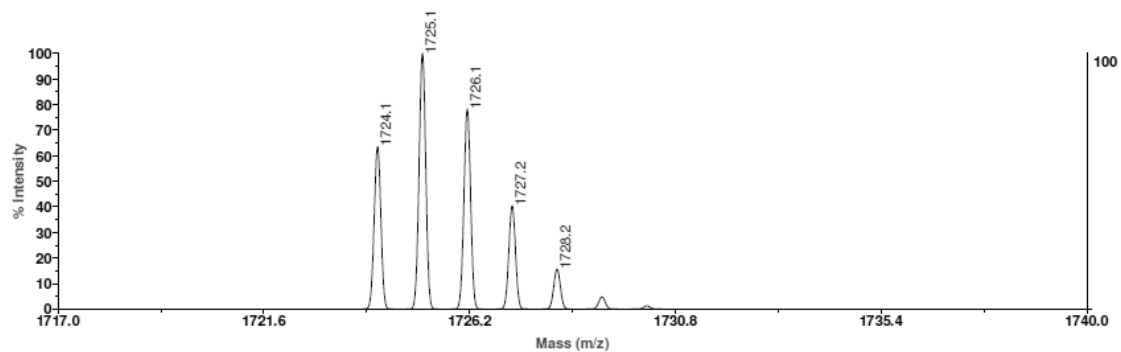

Fig S3. MS MALDI TOF spectrum of 1a,b

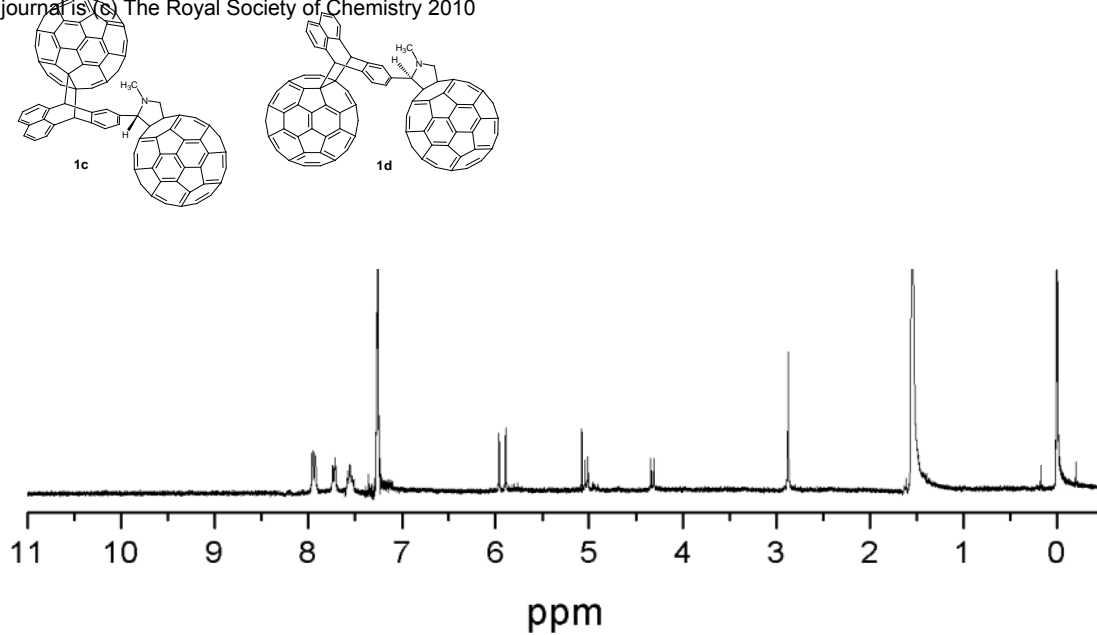

**Fig S4.** <sup>1</sup>H-NMR spectrum of **1c,d**

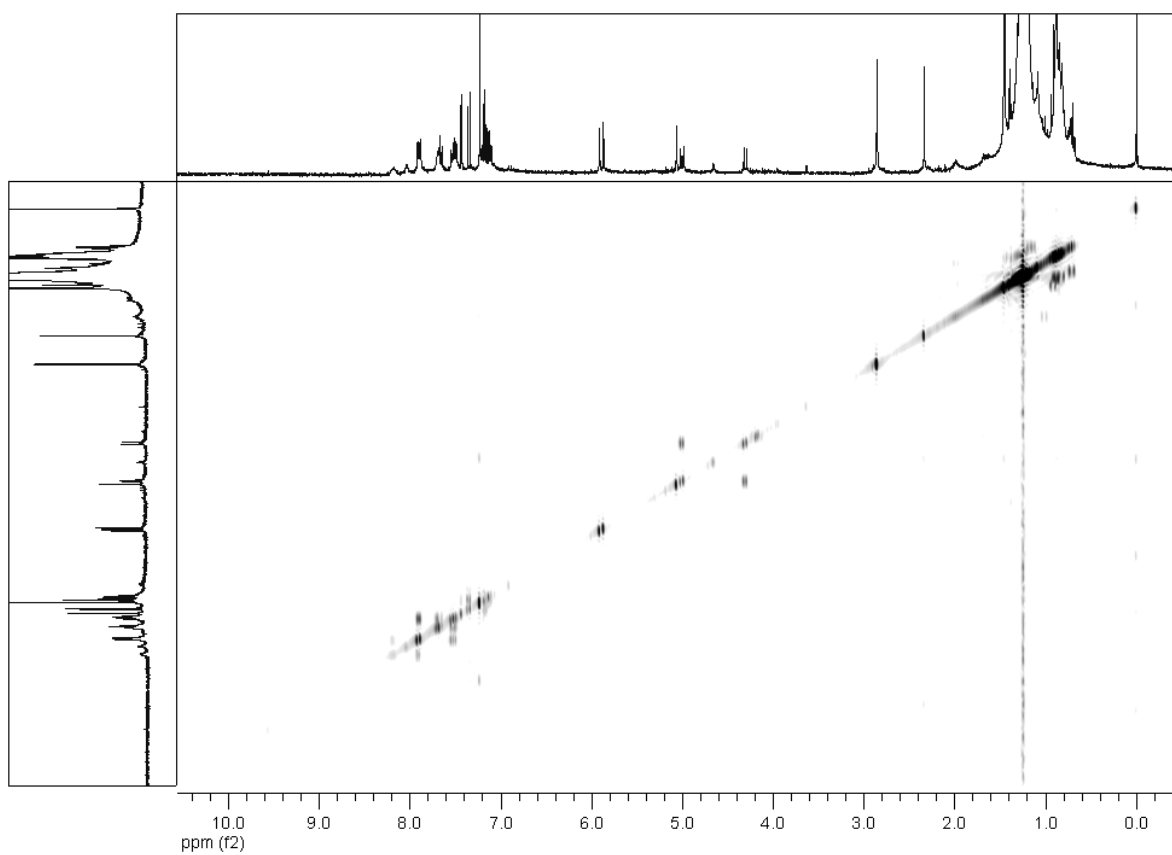

**Fig S5.** H-H COSY spectrum of **1c,d**

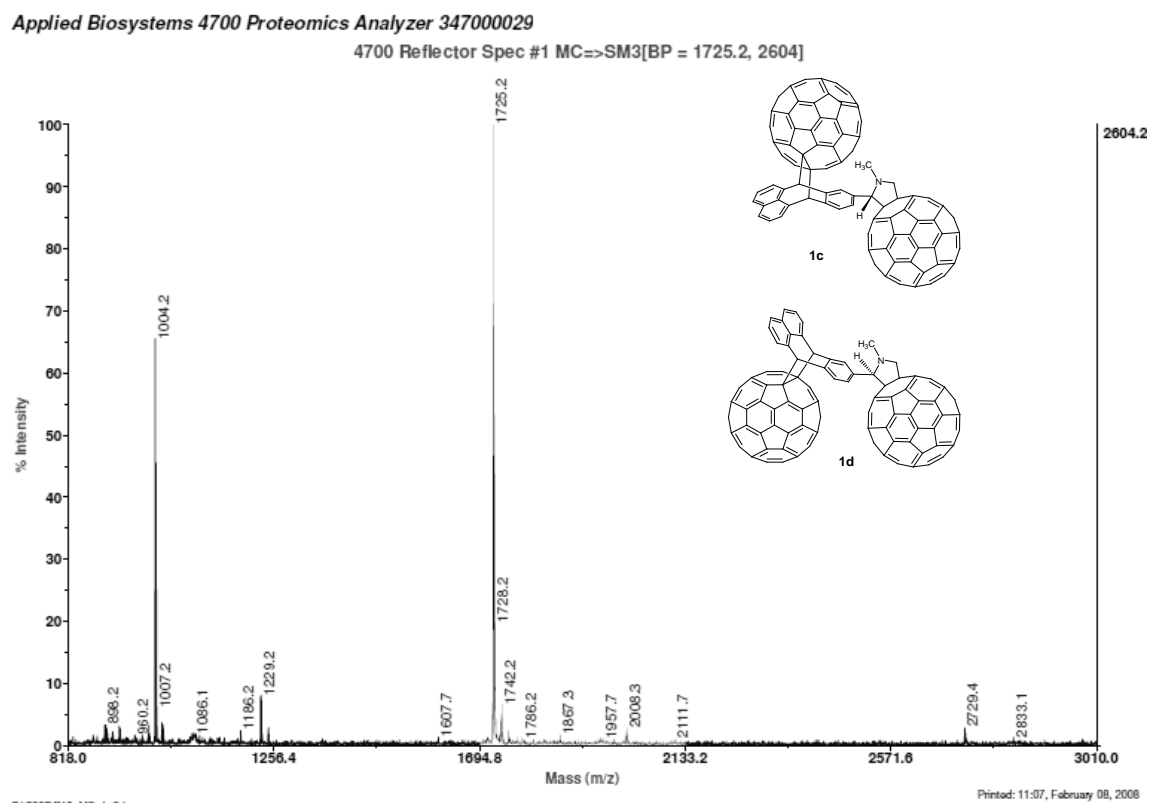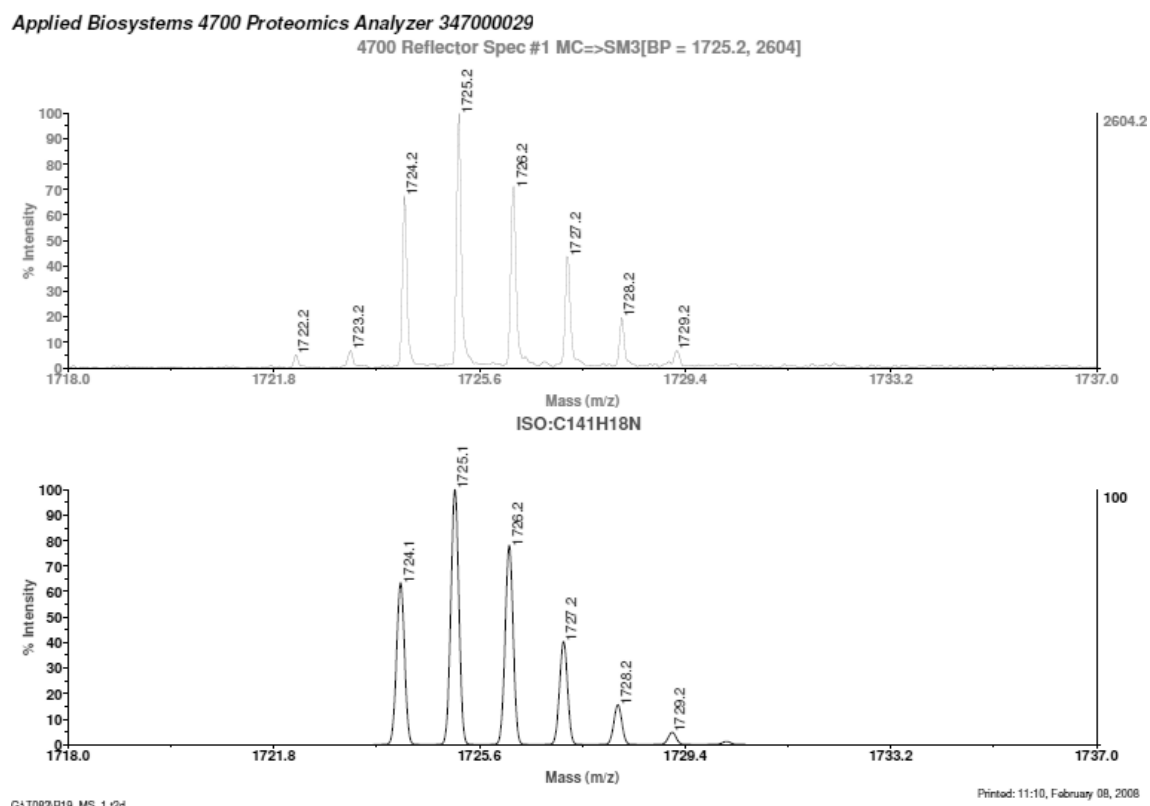

Fig S6. MS MALDI TOF spectrum of **1c,d**

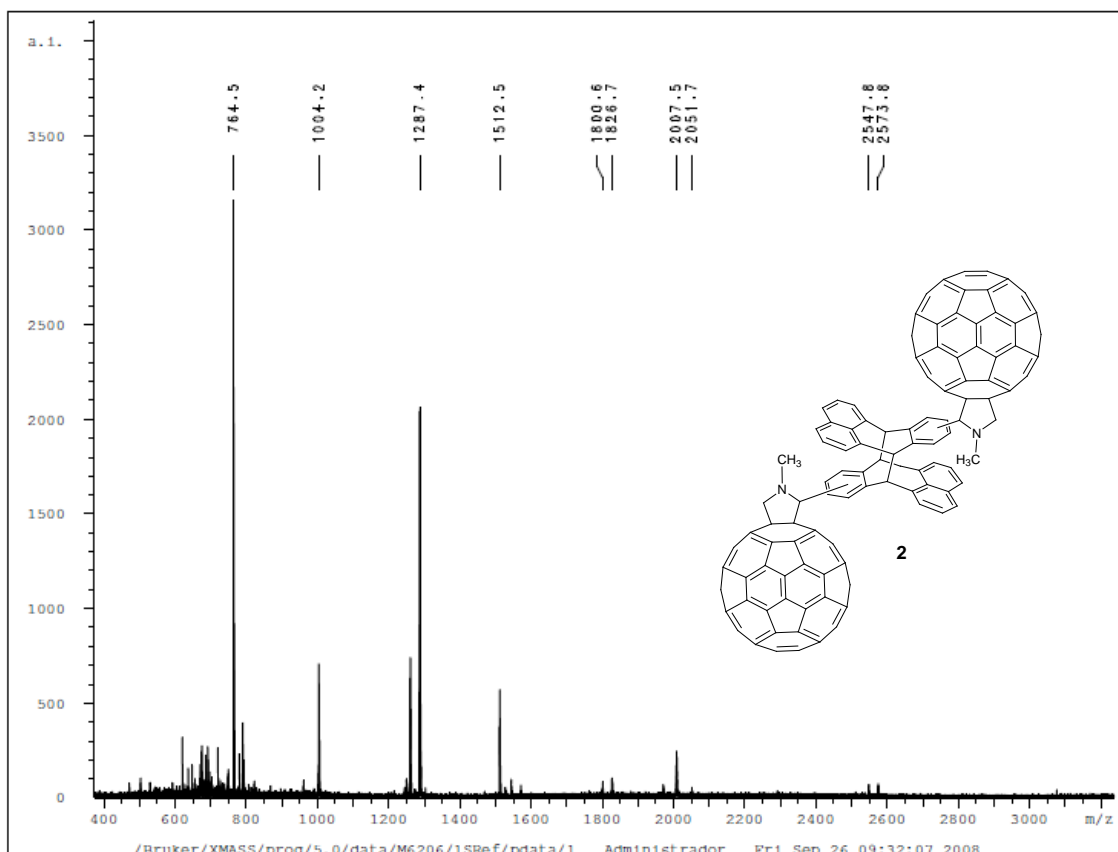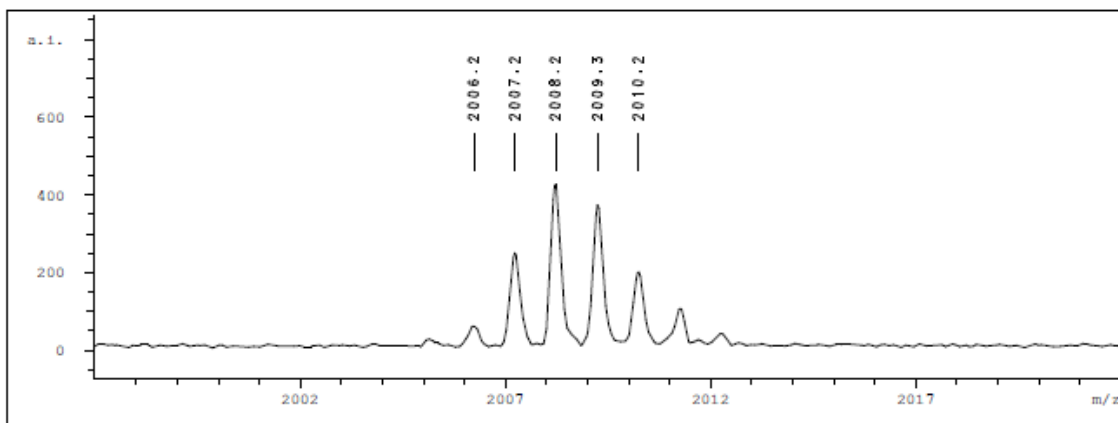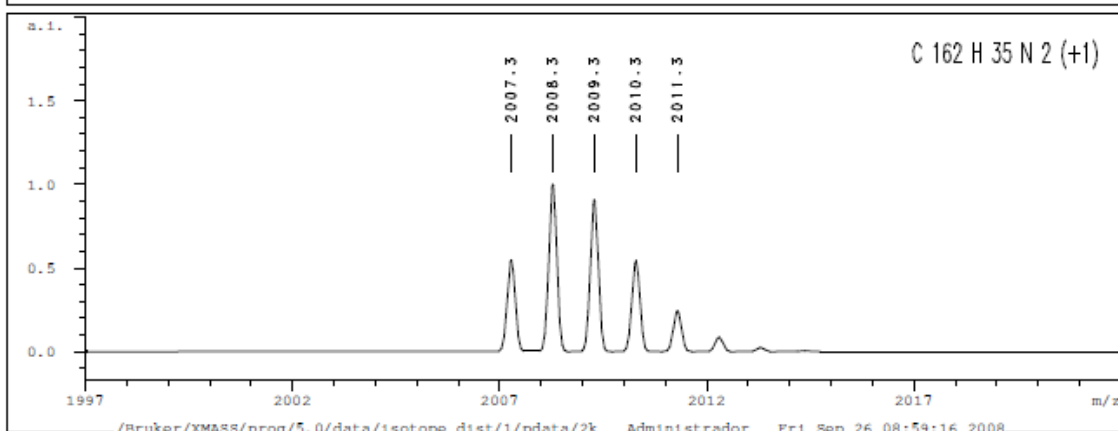

Fig S7. MS MALDI TOF spectrum of 2

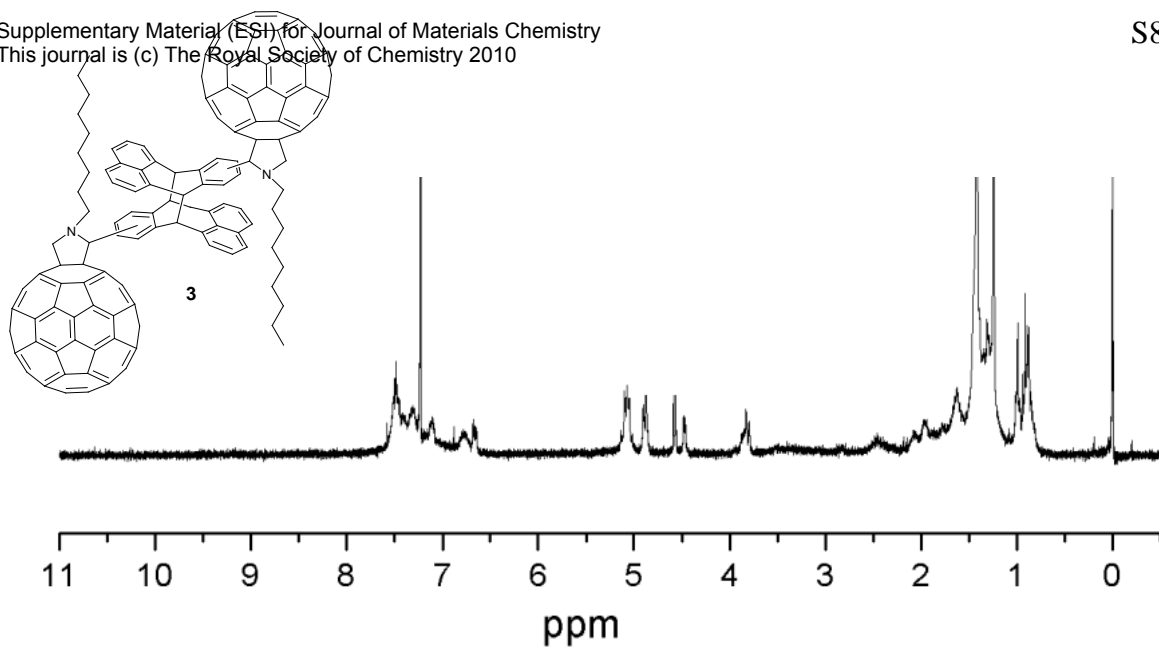

**Fig S8.** <sup>1</sup>H-NMR spectrum of **3**



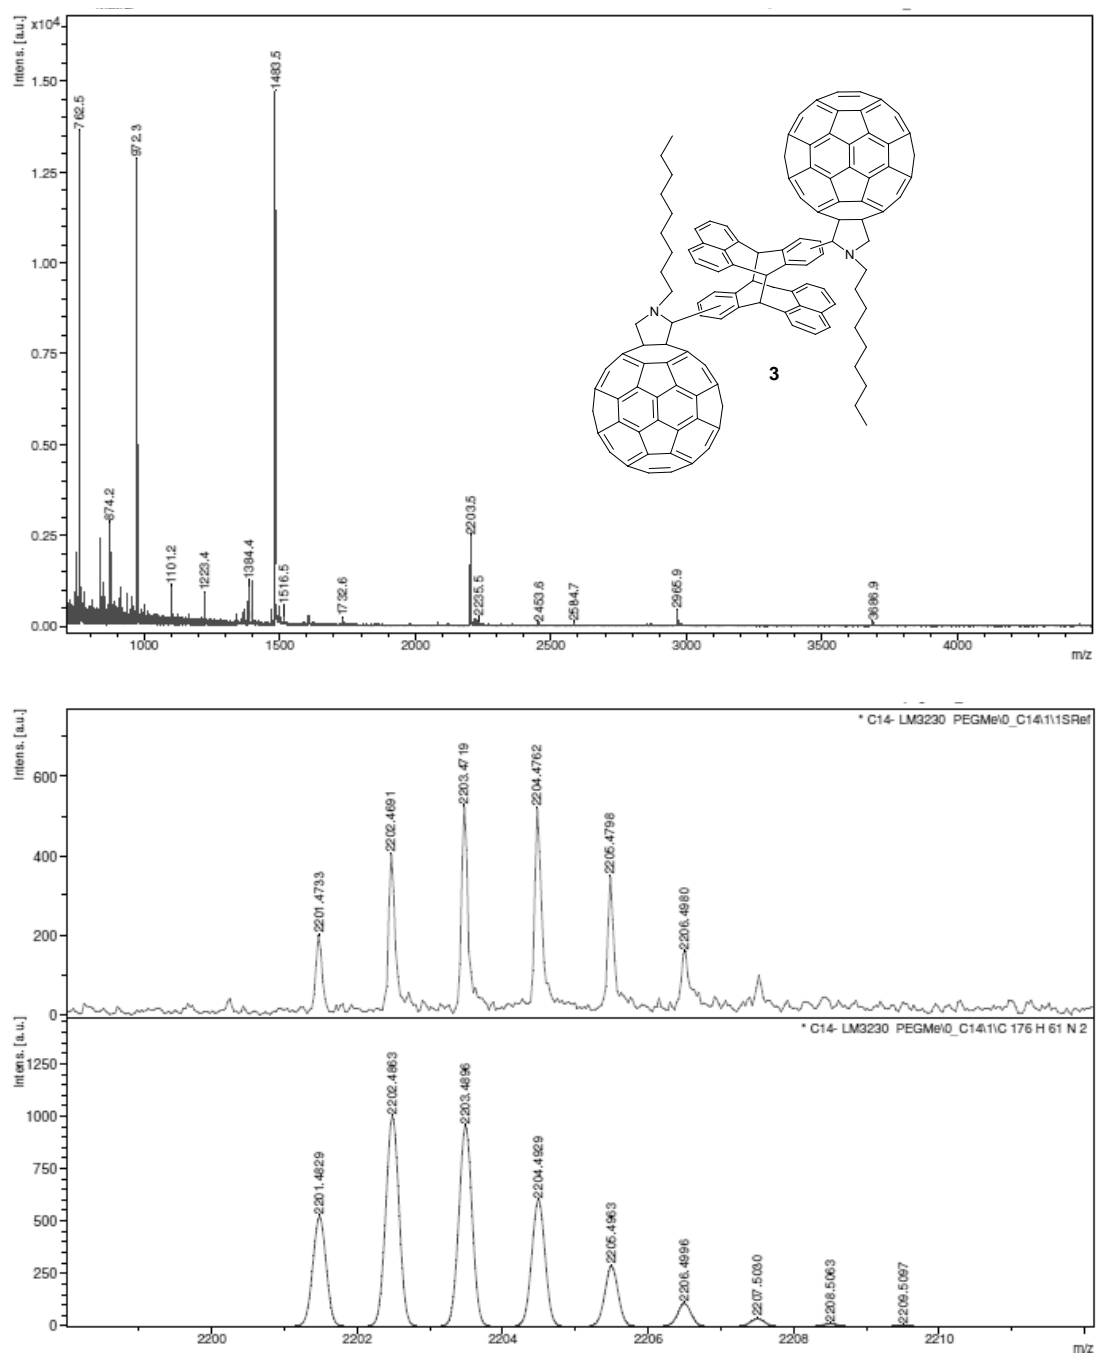

**Fig S9.** MS MALDI TOF spectrum of **3**

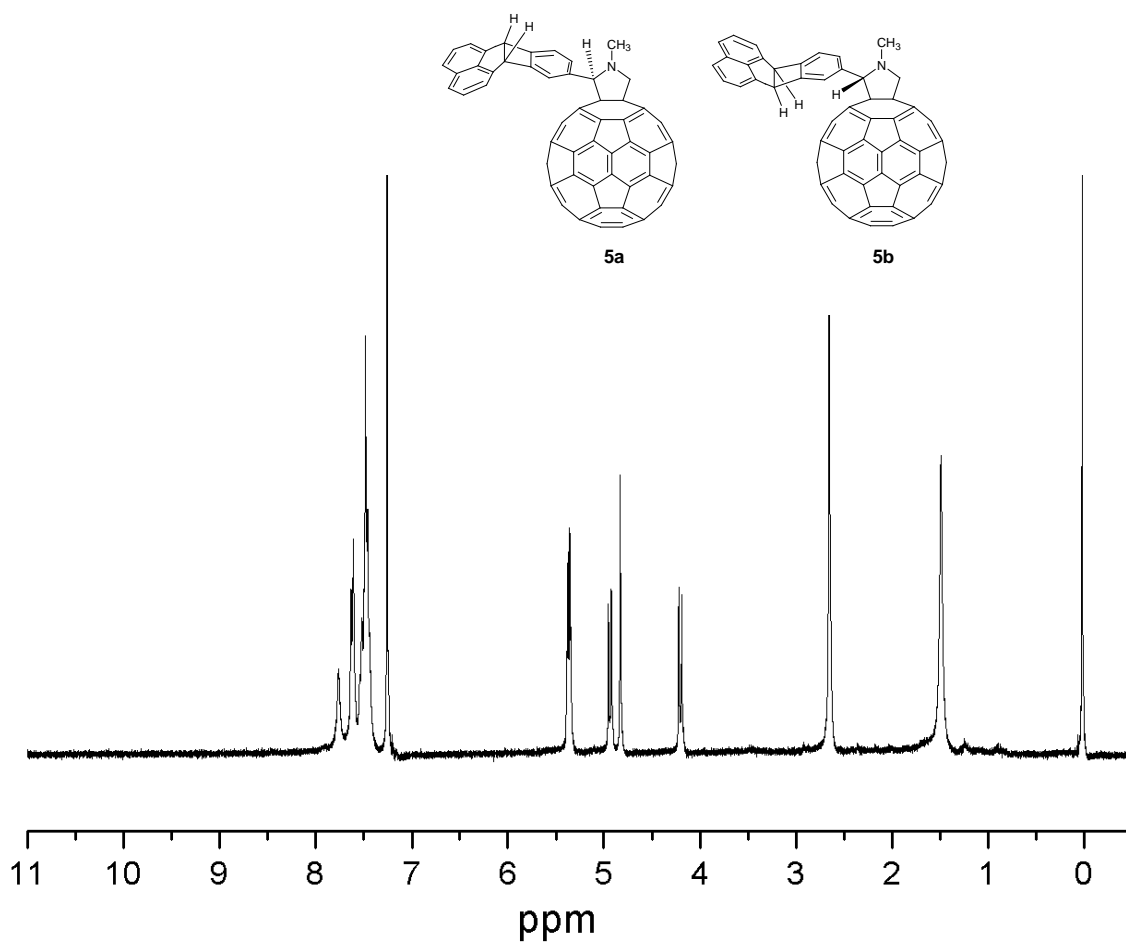

**Fig S10.** <sup>1</sup>H-NMR spectrum of **5a,b**

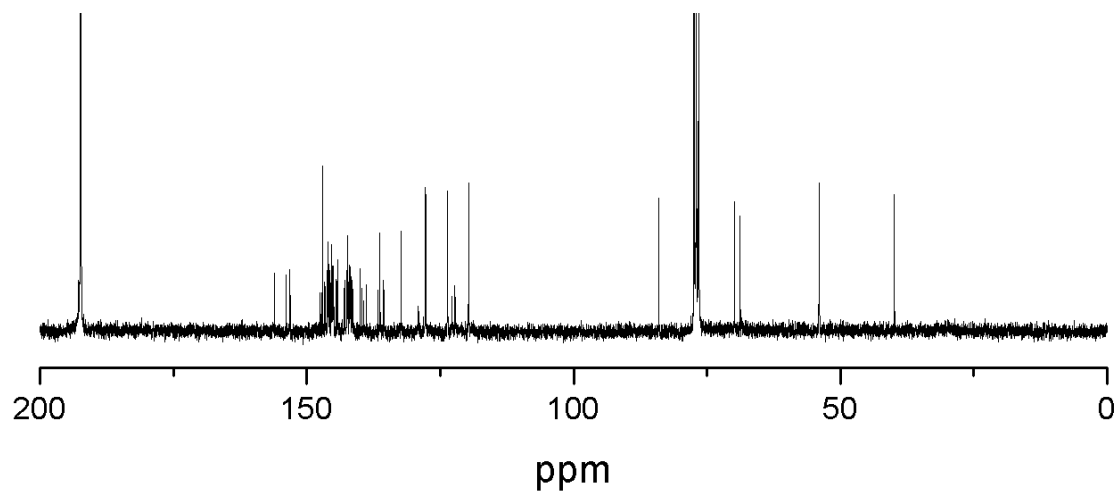

**Fig S11.** <sup>13</sup>C-NMR spectrum of **5a,b**

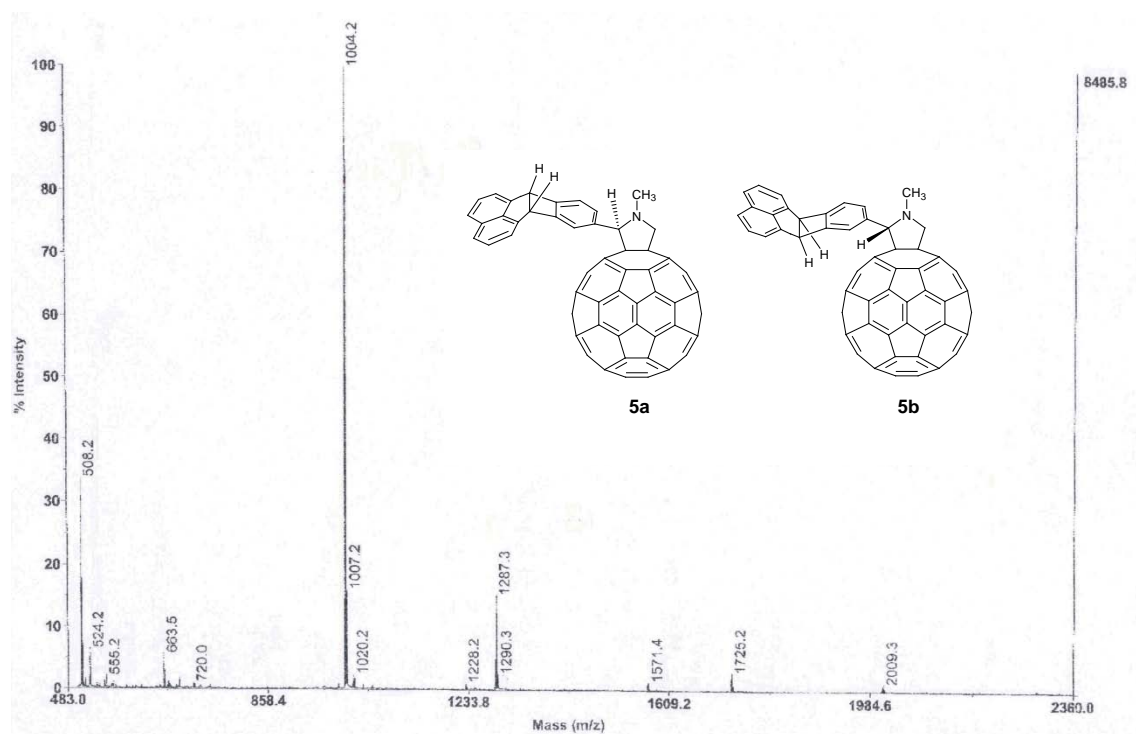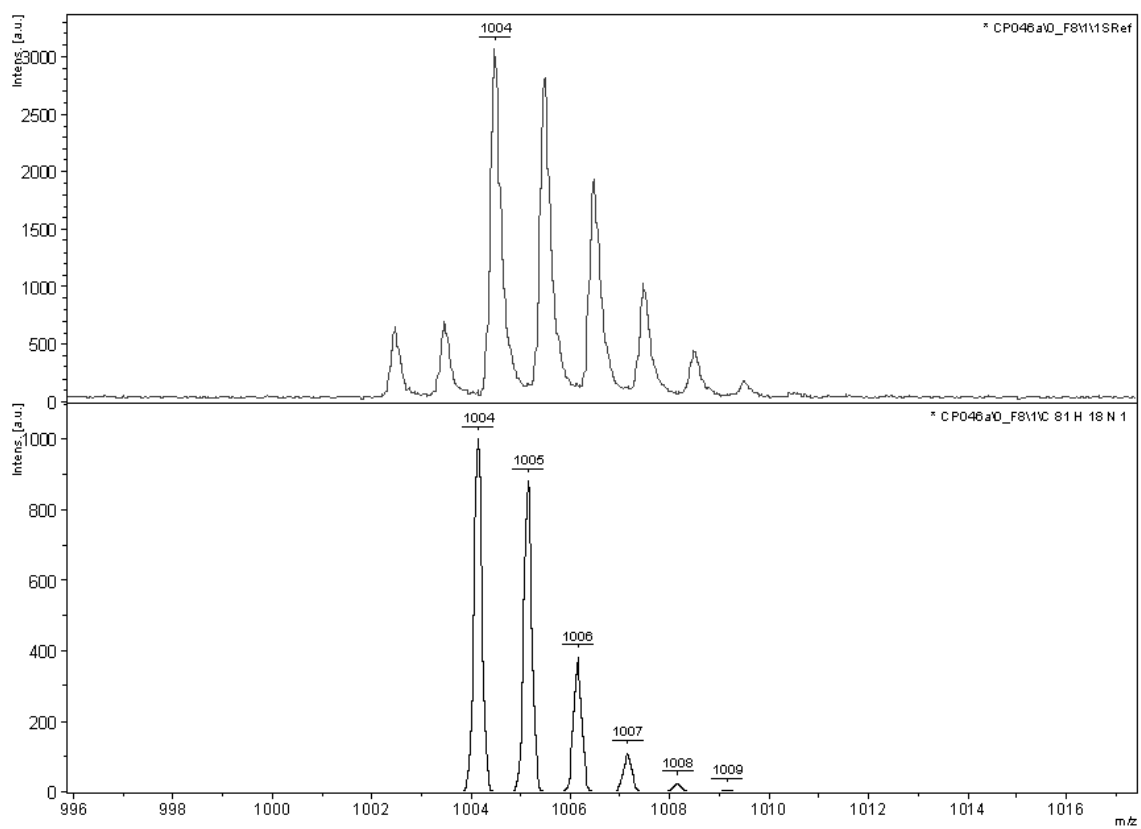

Fig S12. MS MALDI TOF spectrum of 5a,b

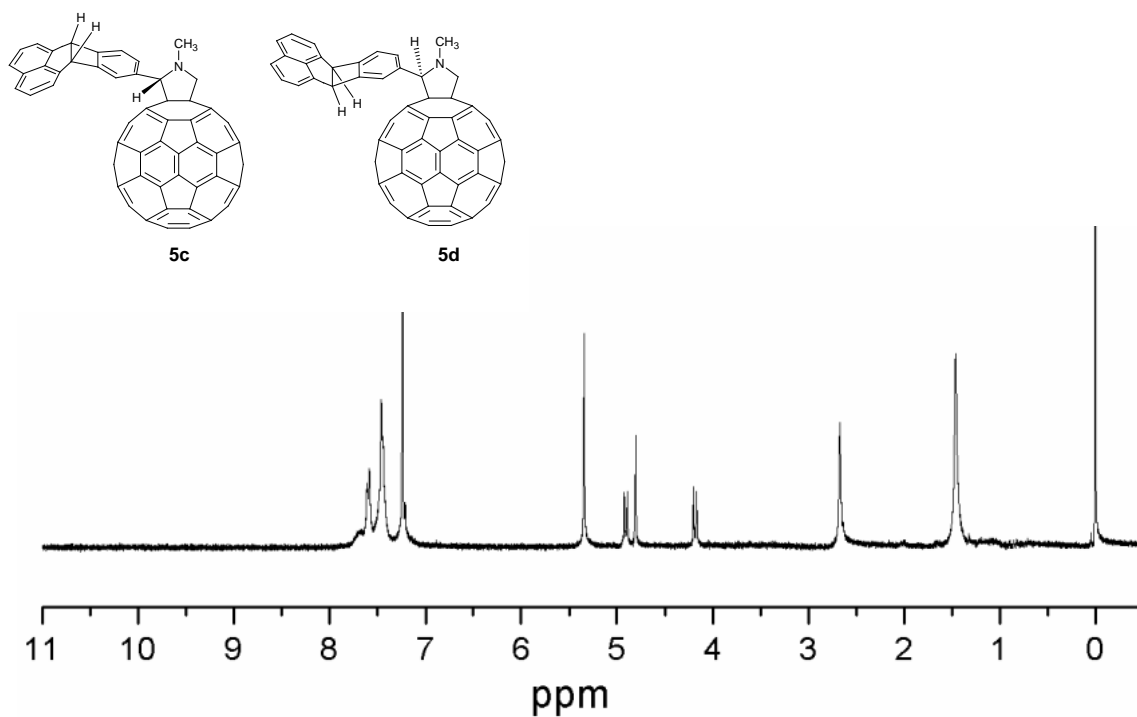

**Fig S13.** <sup>1</sup>H-NMR spectrum of 5c,d

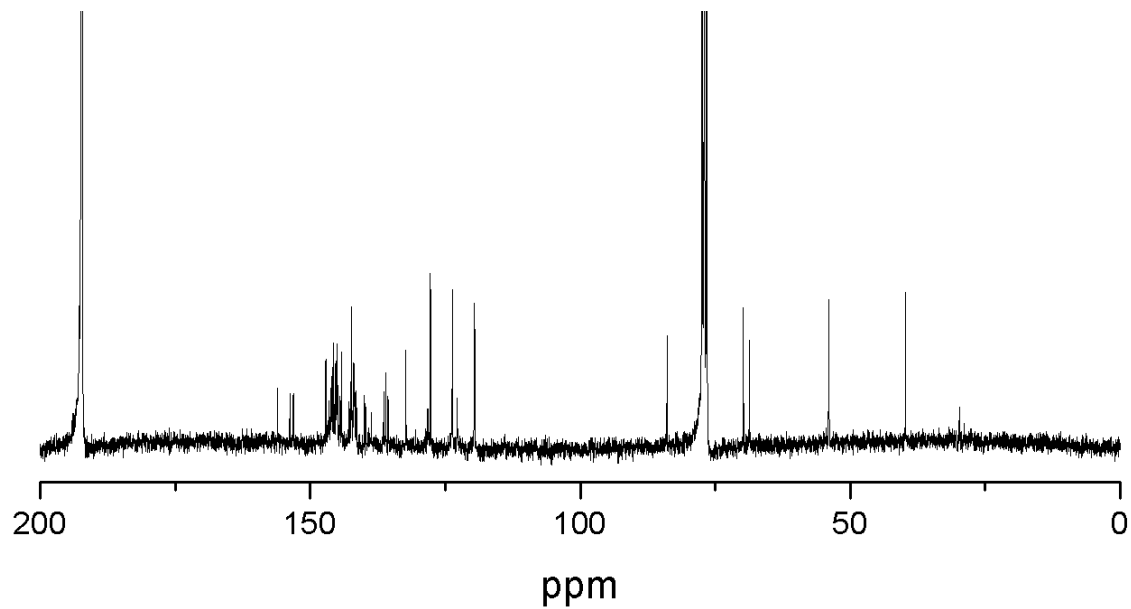

**Fig S14.** <sup>13</sup>C-NMR spectrum of 5c,d

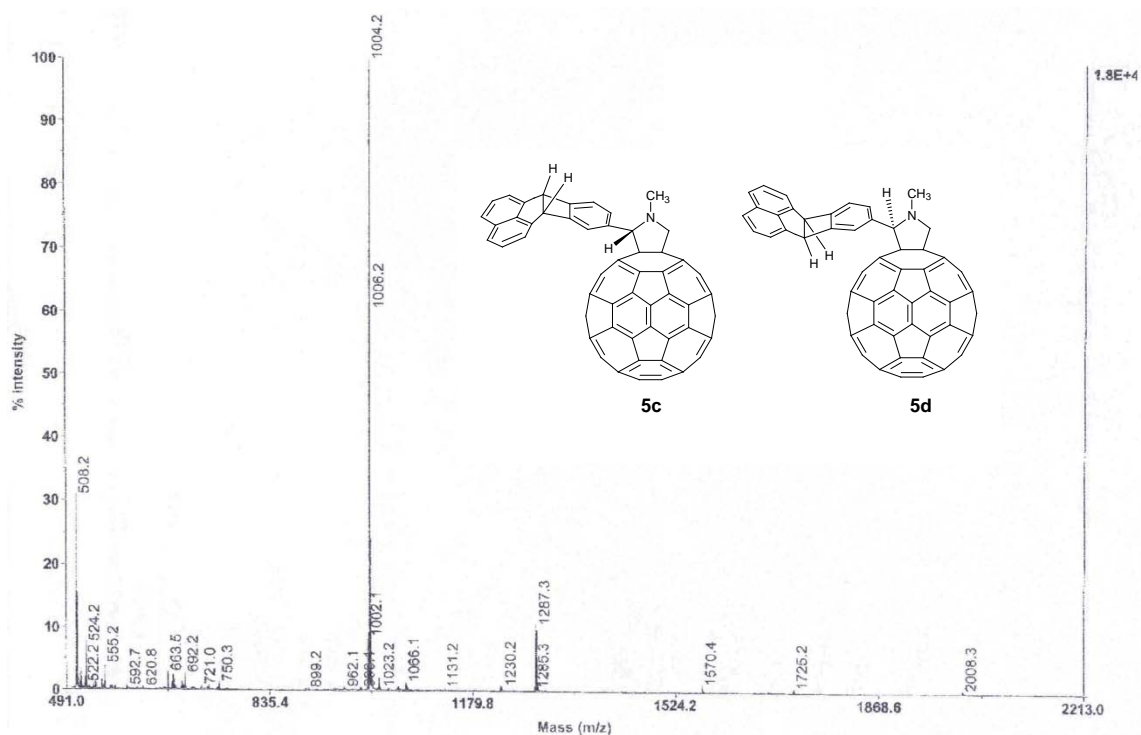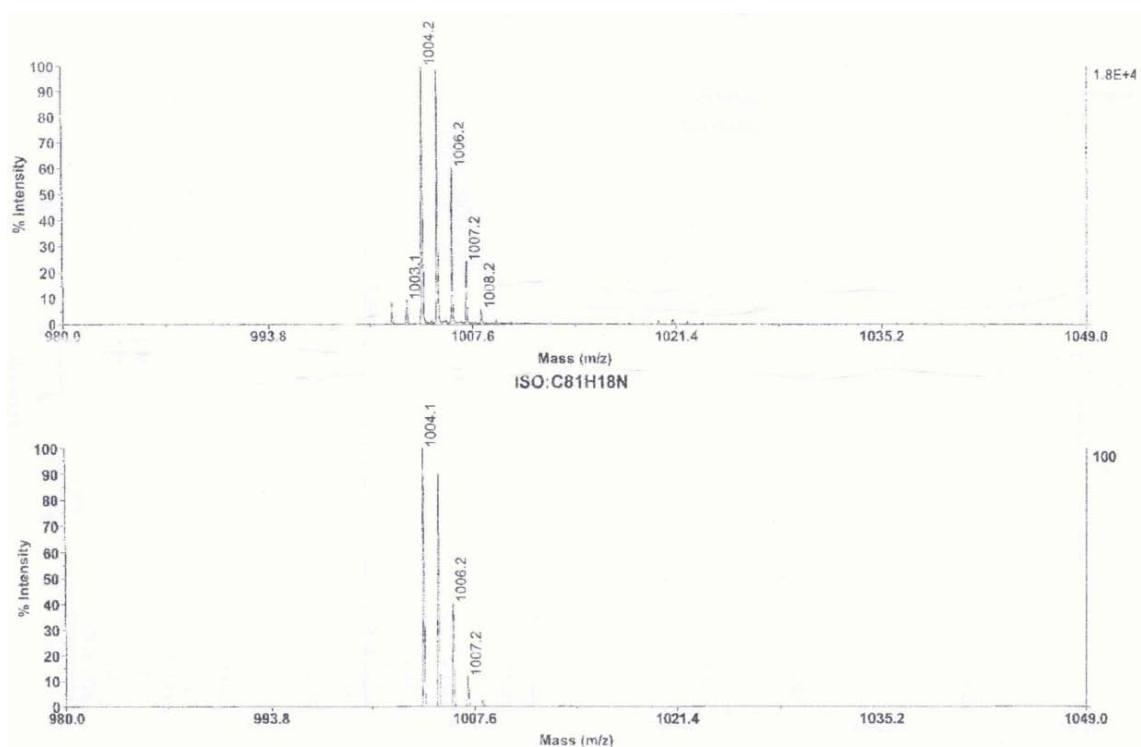

Fig S15. MS MALDI TOF spectrum of 5c,d

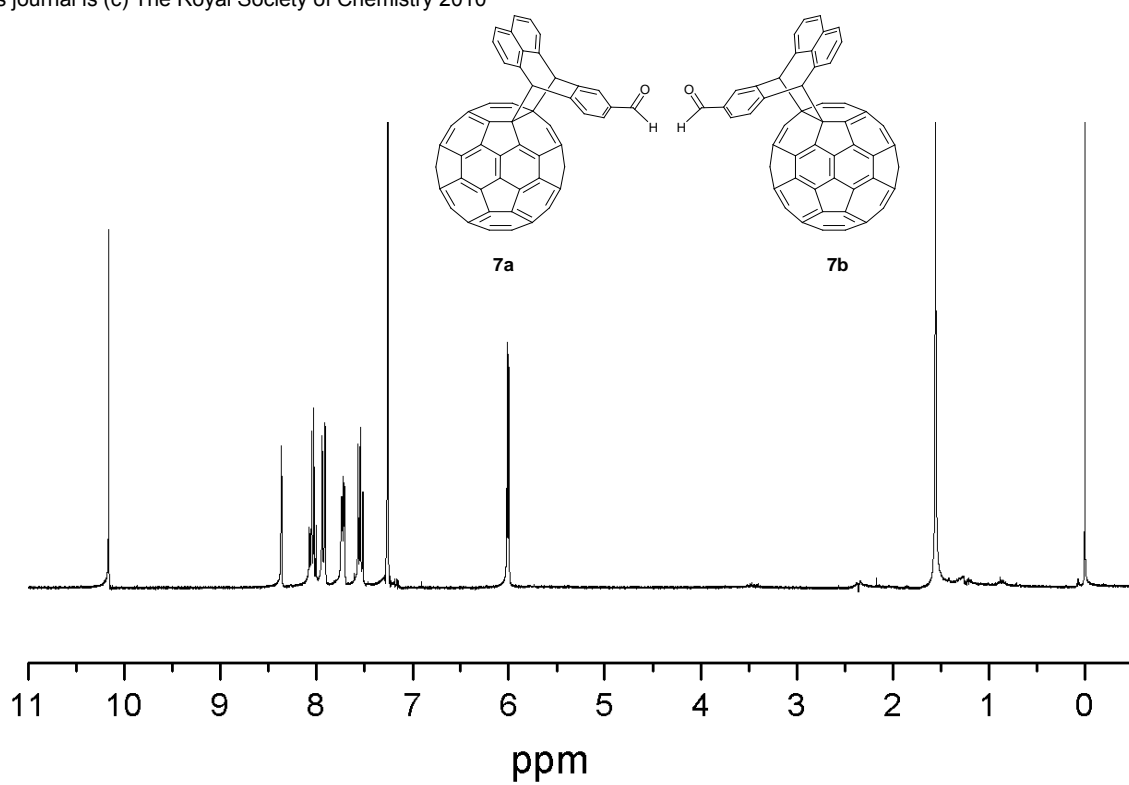

**Fig S16.**  $^1\text{H-NMR}$  spectrum of **7**

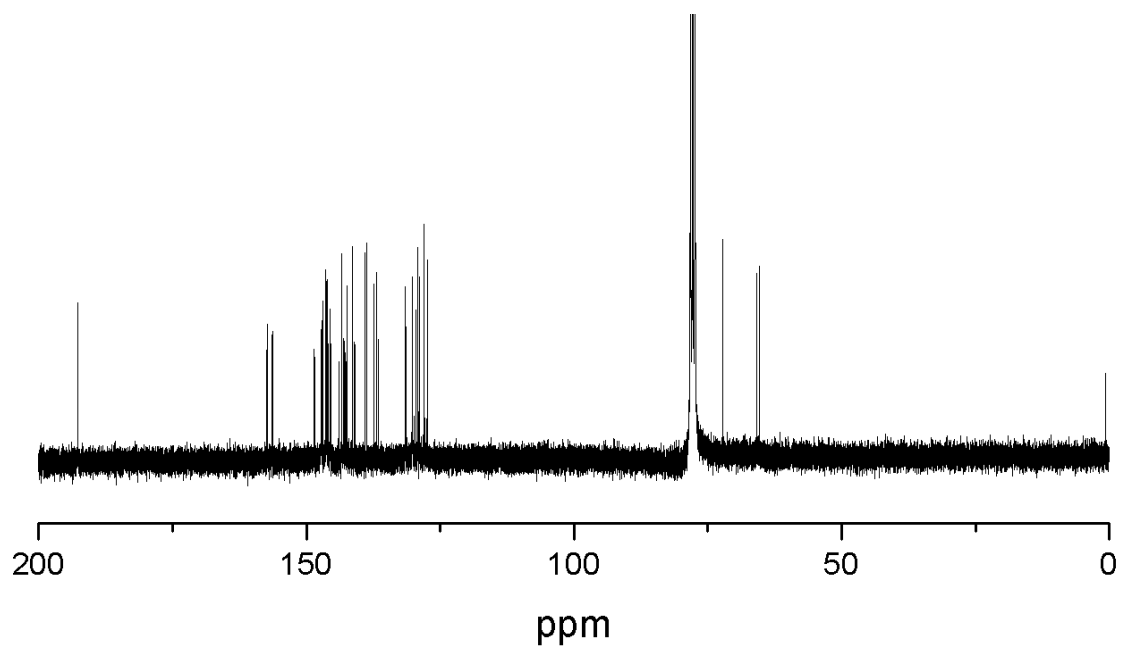

**Fig S17.**  $^{13}\text{C-NMR}$  spectrum of **7**

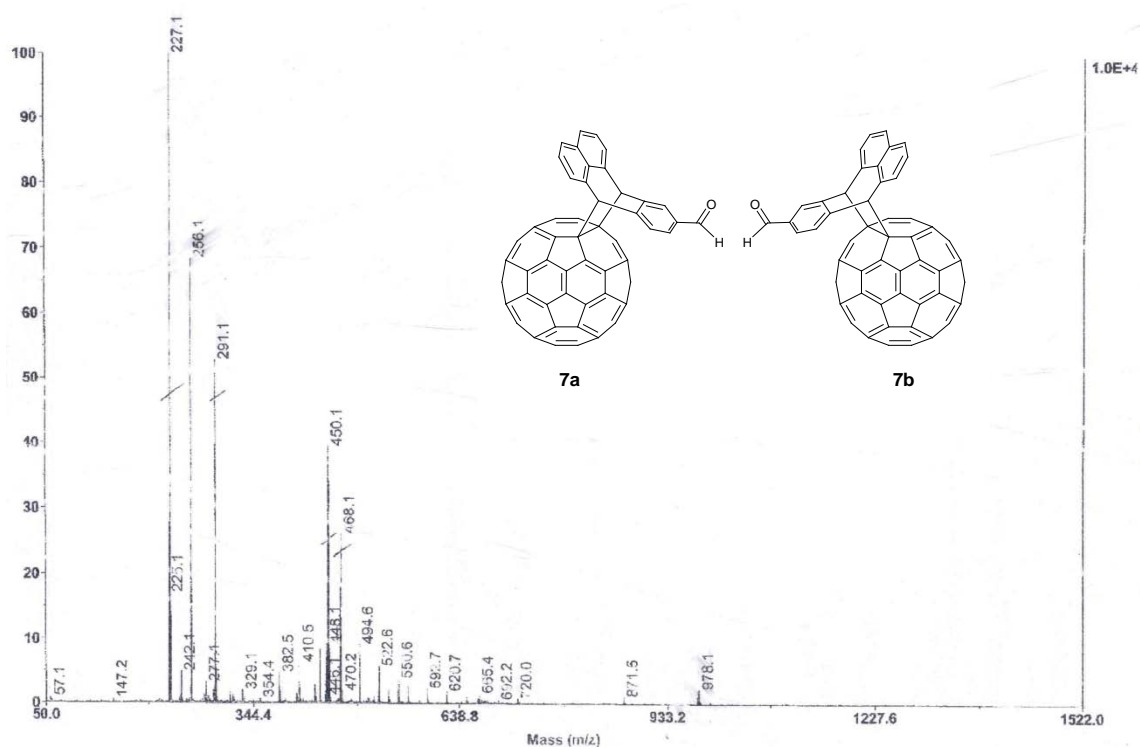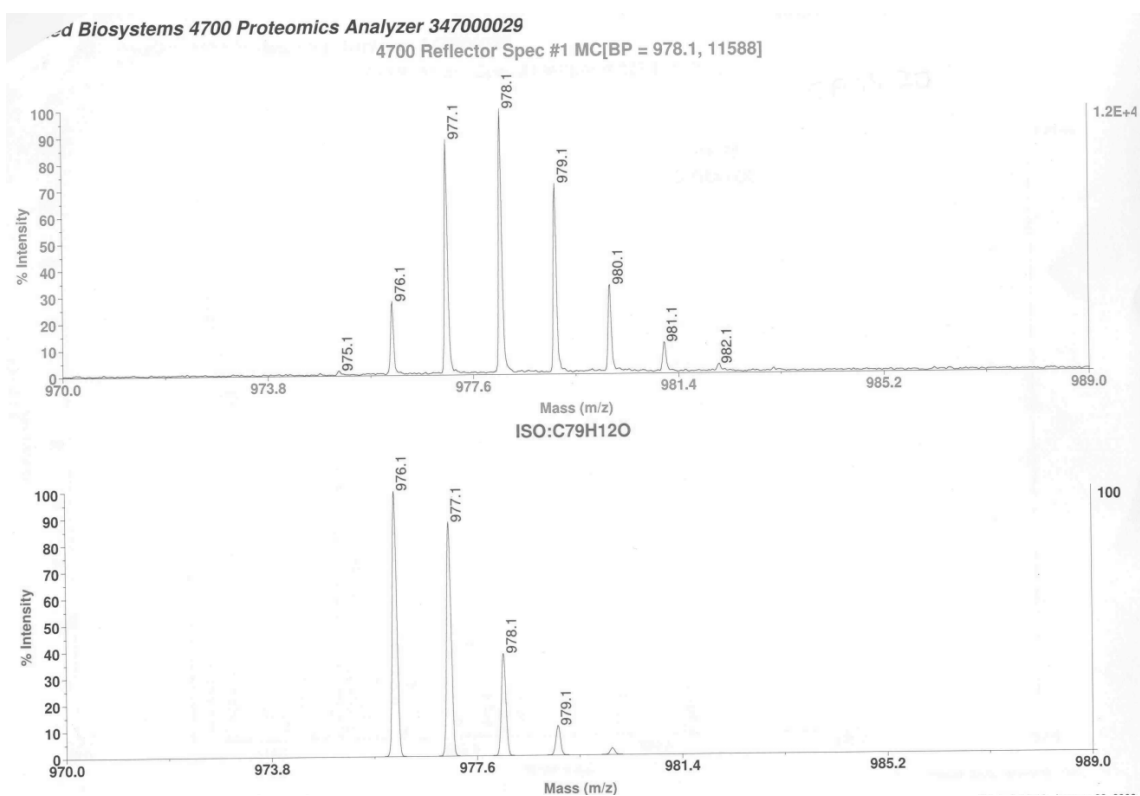

Fig S18. MS MALDI TOF spectrum of 7

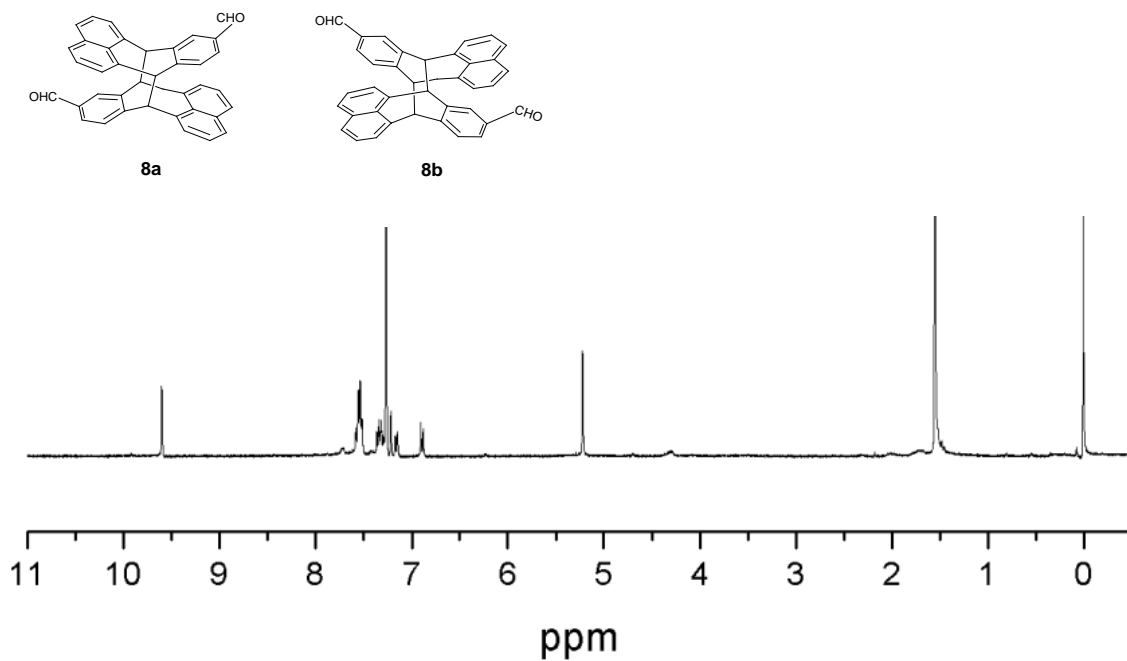

**Fig S19.**  $^1\text{H-NMR}$  spectrum of **8ab**

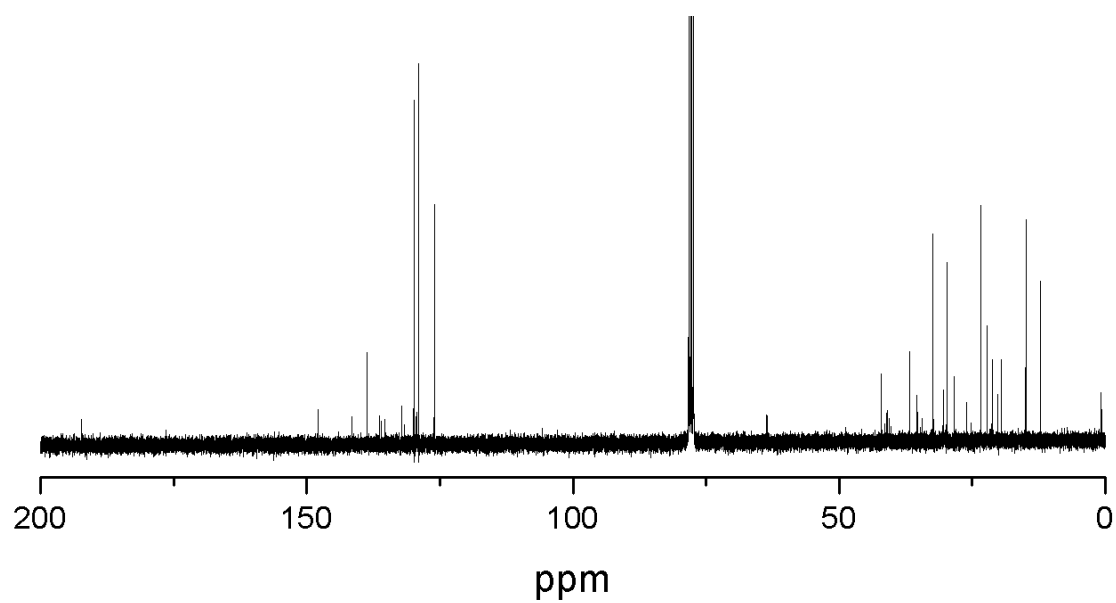

**Fig S20.**  $^{13}\text{C-NMR}$  spectrum of **8a,b**



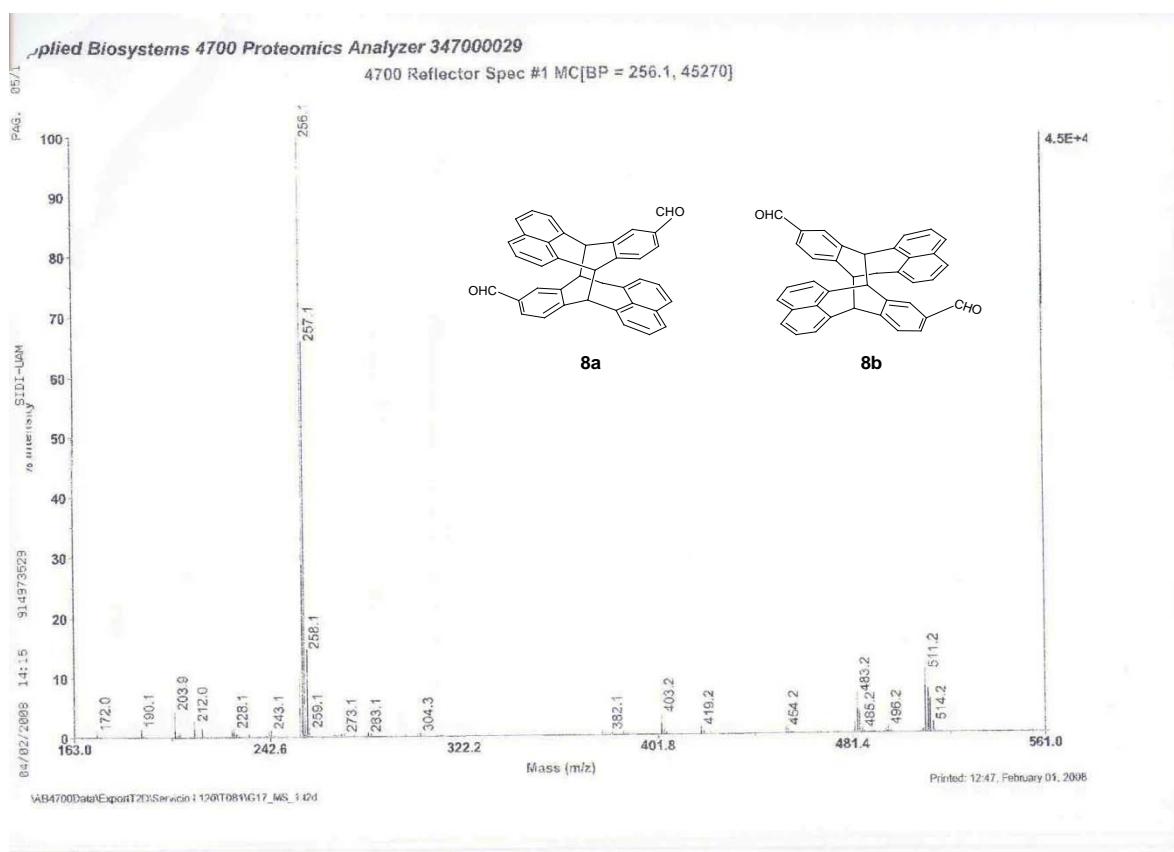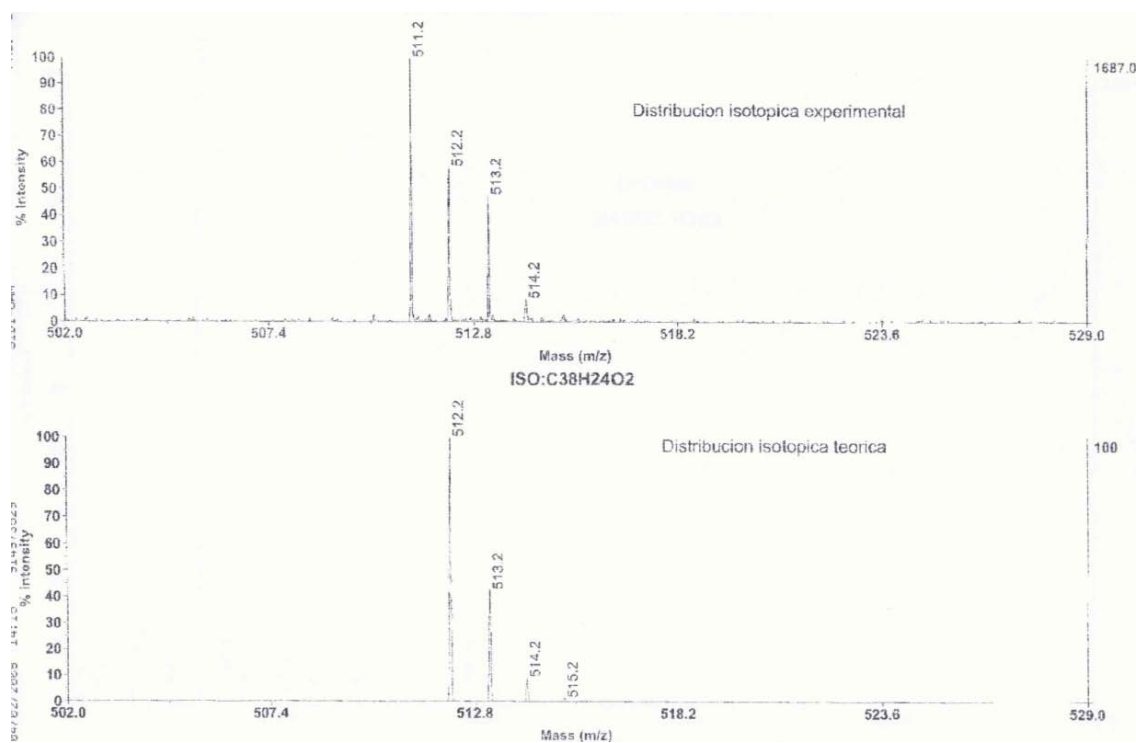

Fig S21. MS MALDI TOF spectrum of **8a,b**

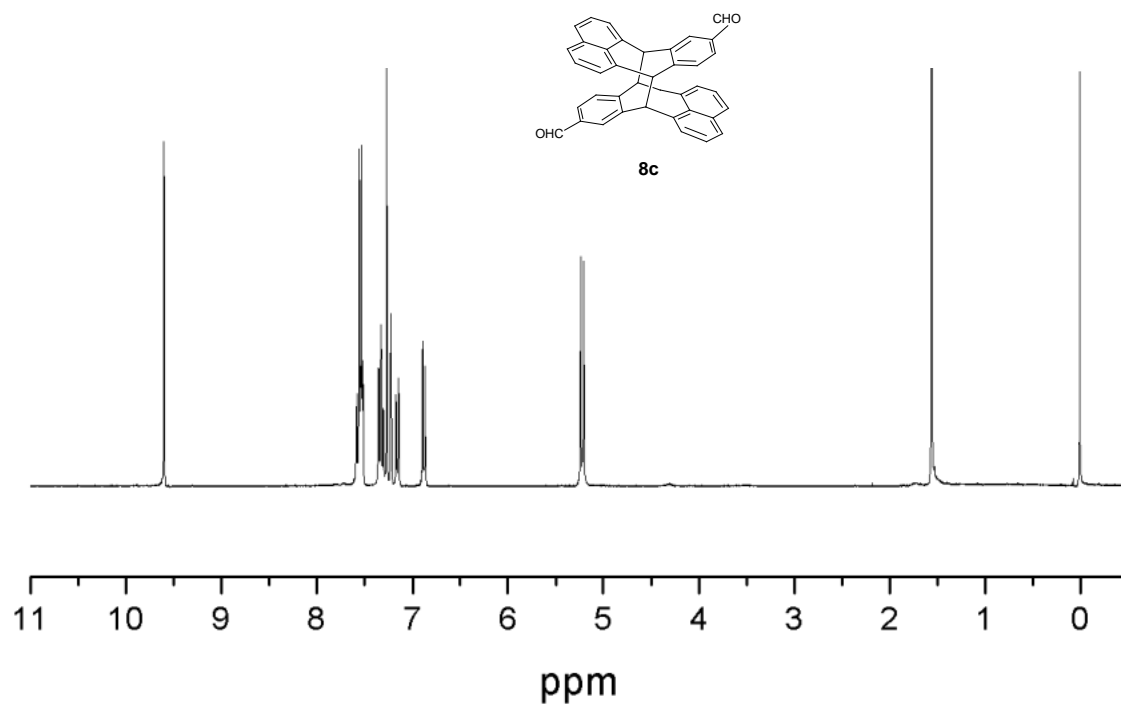

**Fig S22.** <sup>1</sup>H-NMR spectrum of **8c**

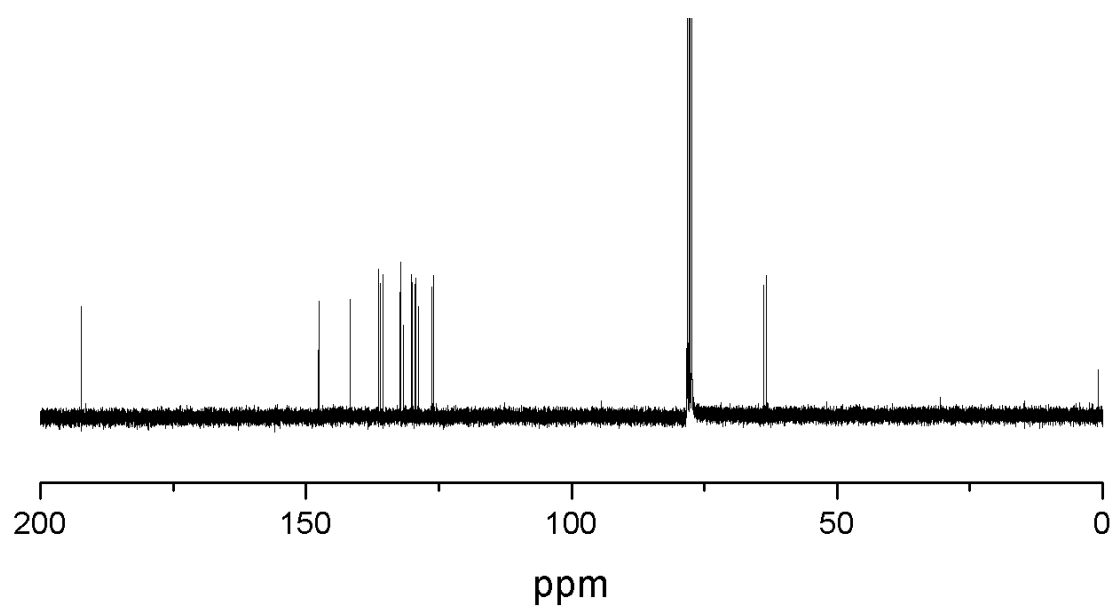

**Fig S23.** <sup>13</sup>C-NMR spectrum of **8c**

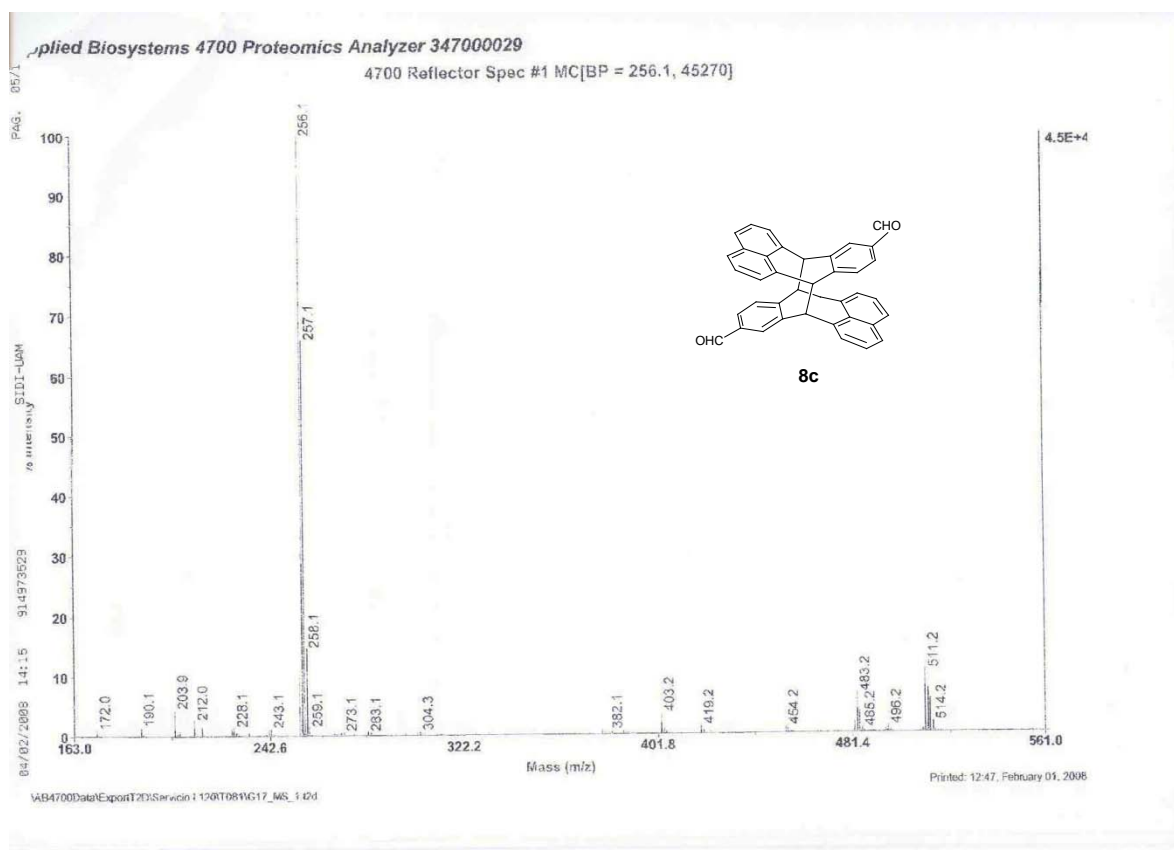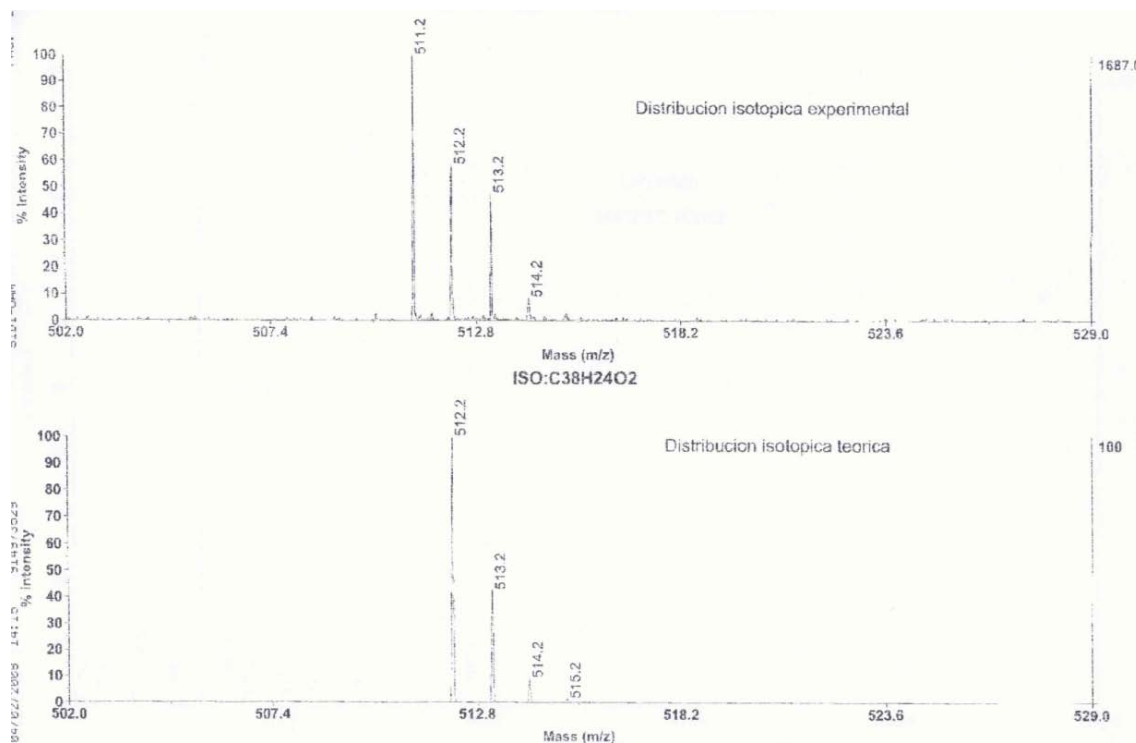

Fig S24. MS MALDI TOF spectrum of **8c**
